# Supplementary material
Source: PubMed Central journal article supplement (PMC3867449)

## Supplementary Figure 2

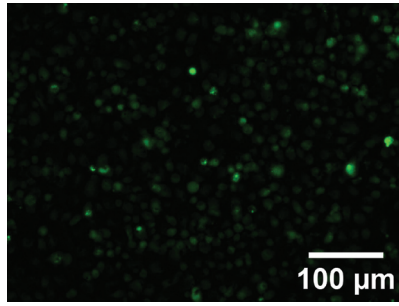

**0.42 mM**

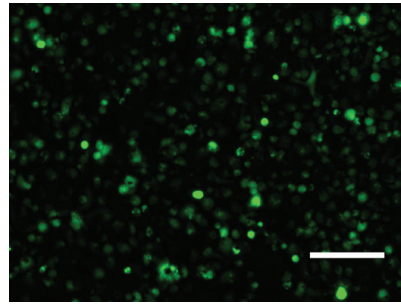

**12 mM**

# Supplementary Figure 3

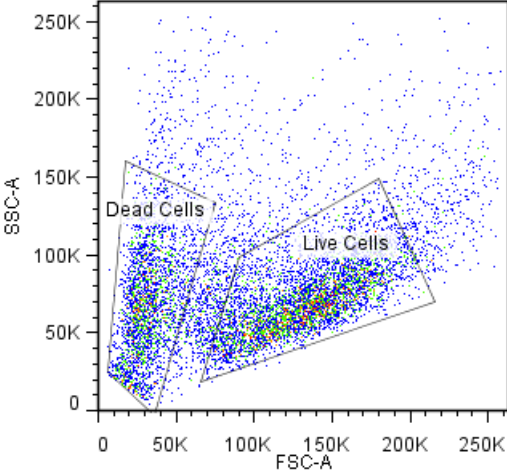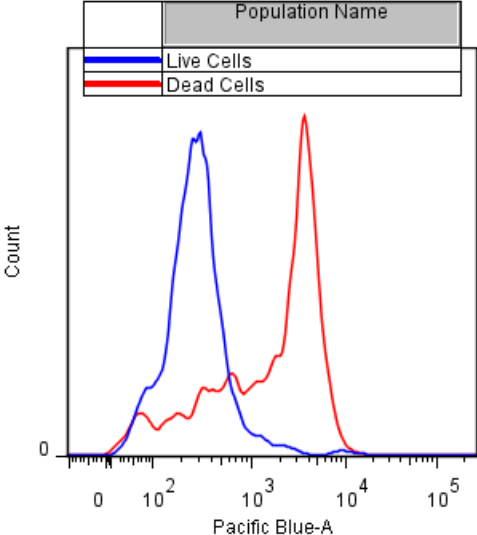

# Supplementary Figure 4

## A

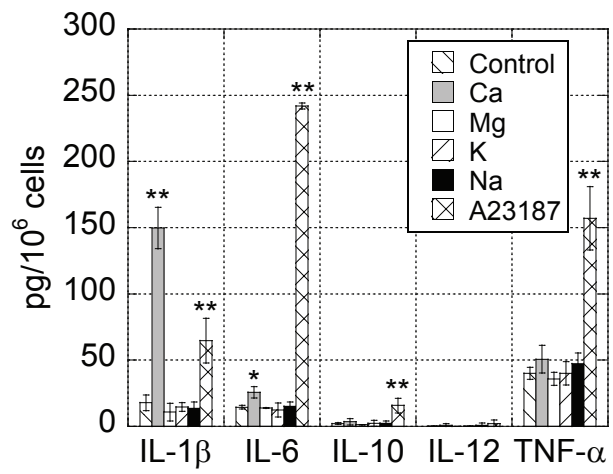

## B

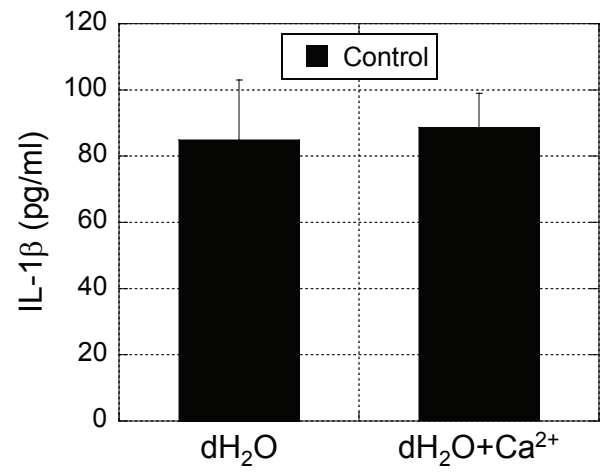

# Supplementary Figure 5

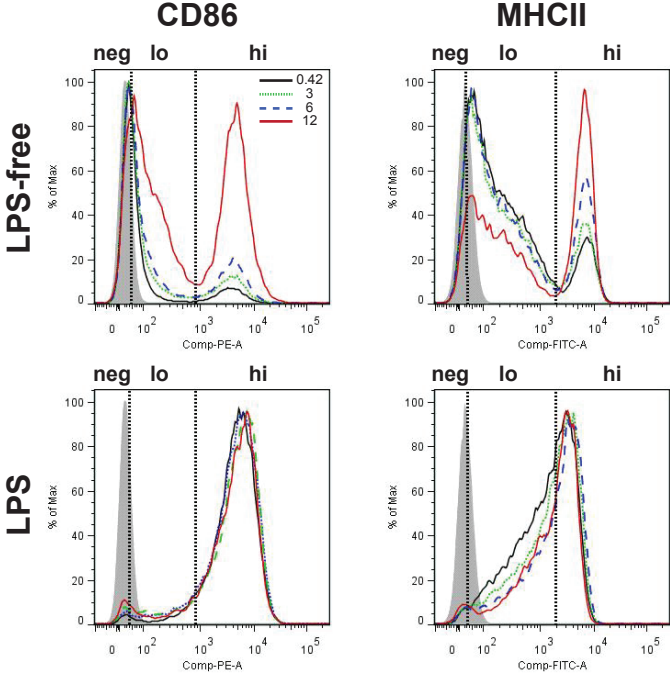

# Supplementary Figure 6

**A**

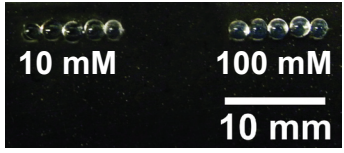

**B**

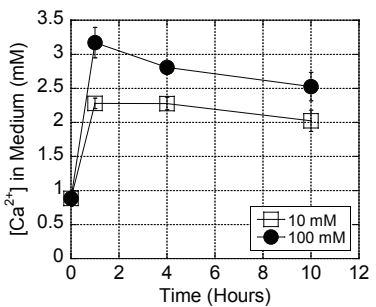

**C**

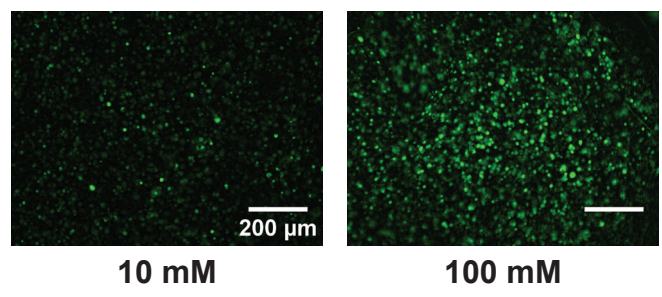

**D**

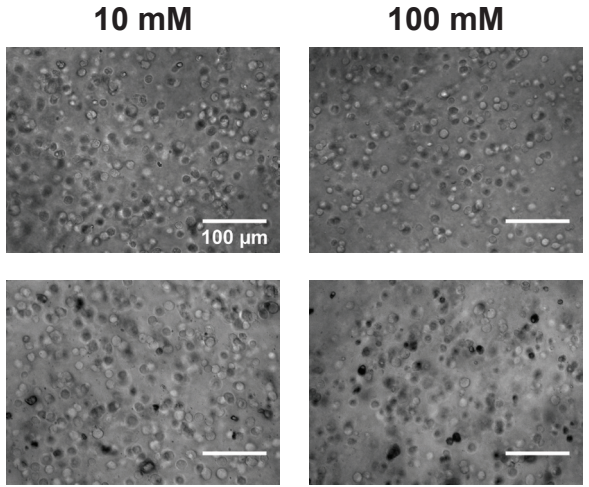

**E**

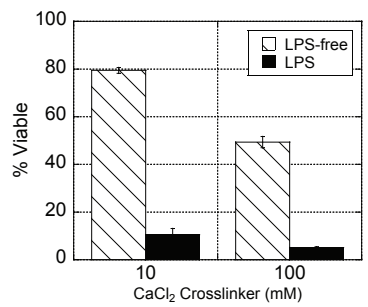

**F**

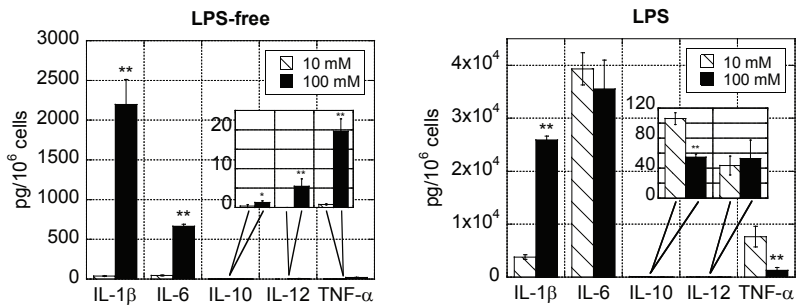

**G**

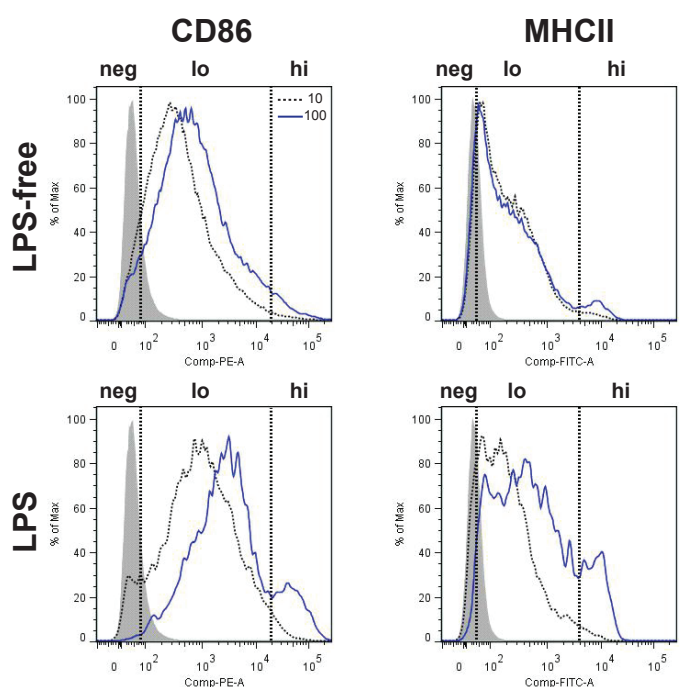

**H**

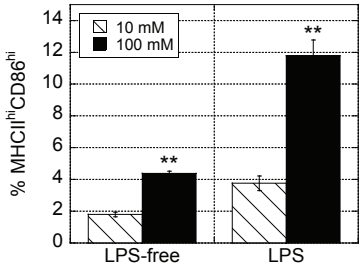

# Supplementary Figure 7

**A**

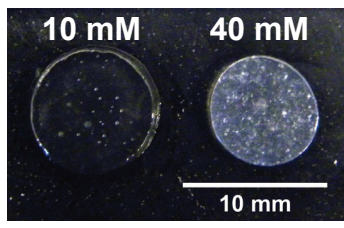

**B**

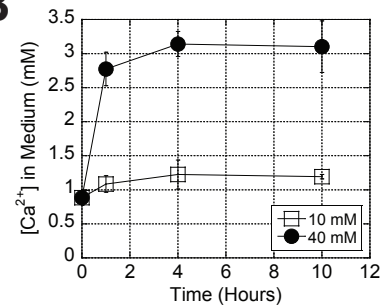

**C**

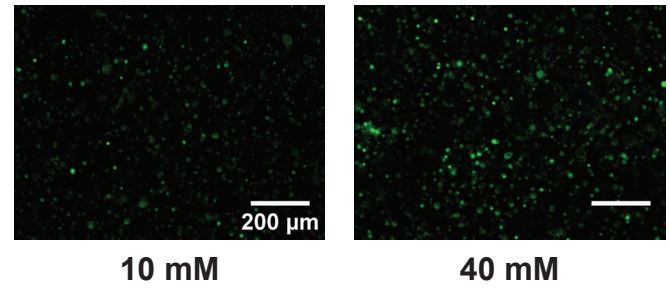

**D**

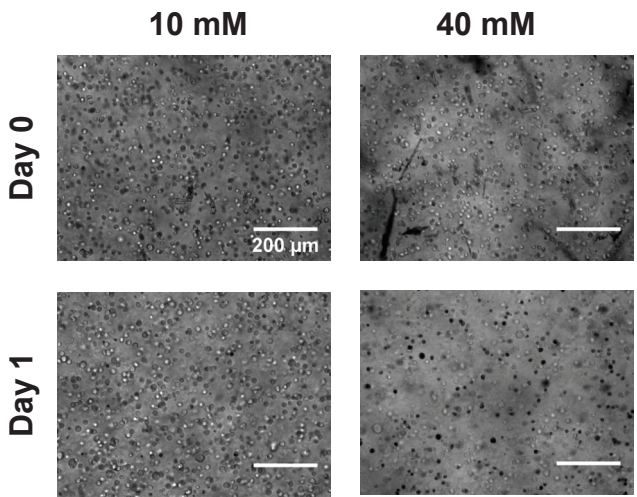

**E**

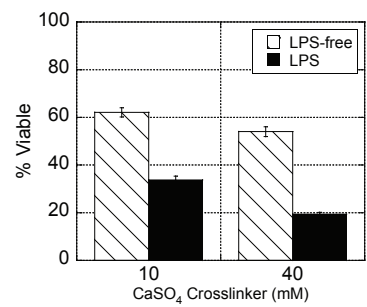

**F**

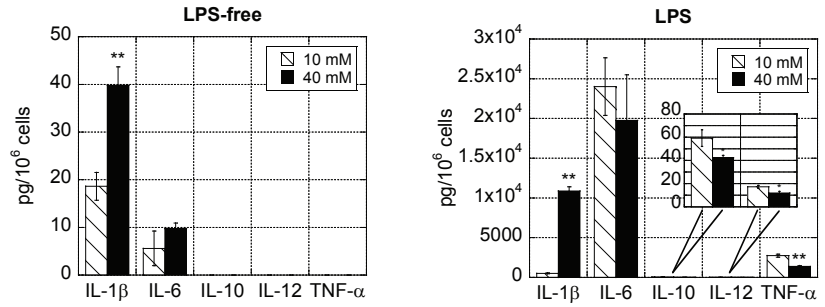

**G**

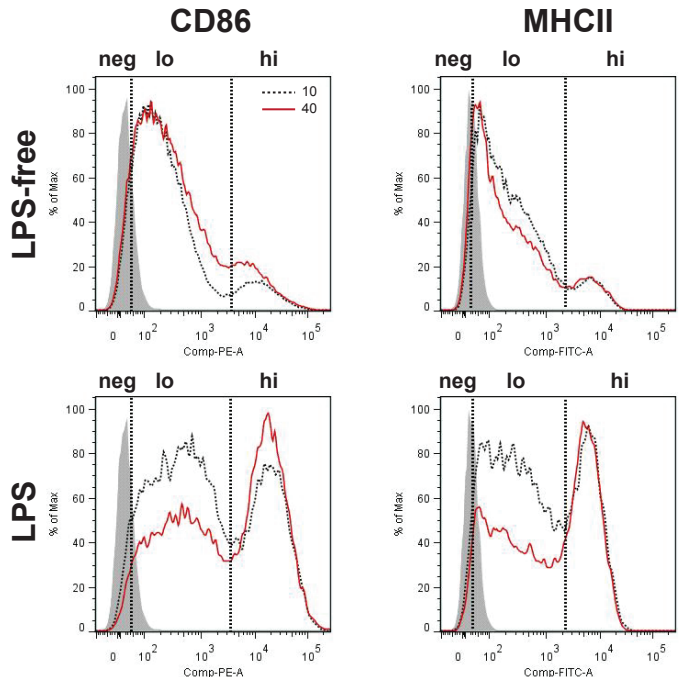

**H**

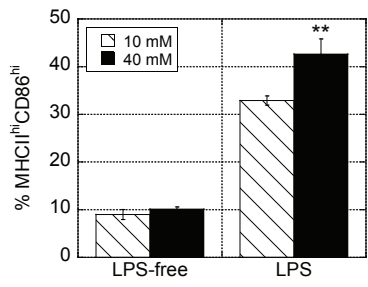

# Supplementary Figure 8

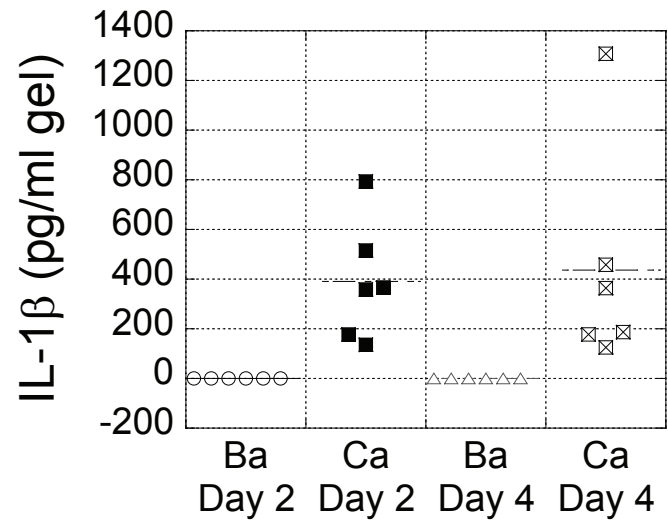

Supplement: NIHMS514912-supplement-02.pdf [file NIHMS514912-supplement-02.pdf]
