# Supplementary material
Source: PubMed Central journal article supplement (PMC3867449)
Supplement: NIHMS514912-supplement-03.pdf [file NIHMS514912-supplement-03.pdf]

## Supplementary Table 1

| <b>Alginate</b> | <b>%M/G</b> | <b>MW (Da)</b> |
|-----------------|-------------|----------------|
| MVG             | >60% G      | >200,000       |
| MVM             | >50% M      | >200,000       |
| LVG             | >60% G      | 75,000-200,000 |
| LVM             | >50% M      | 75,000-200,000 |
| VLVG            | >60% G      | <75,000        |
| VLVM            | >50% M      | <75,000        |
| G Blocks        | 100% G      | 5,000-10,000   |
| M Blocks        | 100% M      | 5,000-10,000   |
